# Supplementary material for: Defect chemistry and transport properties of perovskite-type oxides La1−xCaxFeO3−δ
Source: Royal Society of Chemistry journal article supplement (doi:10.1039/d0ta07508f), 2020-12-10
Supplement: d0ta07508f1.pdf [file d0ta07508f1.pdf]

---

## Supplementary information

---

### Defect chemistry and transport properties of perovskite-type oxides $\text{La}_{1-x}\text{Ca}_x\text{FeO}_{3-\delta}$

Jia Song,<sup>a</sup> Shaochen Zhu,<sup>a</sup> De Ning<sup>b</sup> and Henny J.M. Bouwmeester<sup>\*acd</sup>

<sup>a</sup>*Electrochemistry Research Group, Membrane Science and Technology, MESA+ Institute for Nanotechnology, University of Twente, P.O. Box 217, 7500 AE, Enschede, The Netherlands*

<sup>b</sup>*Helmholtz-Zentrum Berlin für Materialien und Energie, Hahn-Meitner-Platz 1, 14109 Berlin, Germany*

<sup>c</sup>*CAS Key Laboratory of Materials for Energy Conversion, Department of Materials Science and Engineering, University of Science and Technology of China, Hefei, 230026, P. R. China*

<sup>d</sup>*Forschungszentrum Jülich GmbH, Institute of Energy and Climate Research-IEK-1, Leo-Brandt-Str. 1, D-52425, Jülich, Germany*

**Table S1** Structural data of  $\text{La}_{1-x}\text{Ca}_x\text{FeO}_{3-\delta}$  from Rietveld refinements of room-temperature XRD data. The numbers in parentheses denote standard deviations in units of the least significant digits.

|                 | Site                                                                     | x          | y          | z          | B       | occ   |
|-----------------|--------------------------------------------------------------------------|------------|------------|------------|---------|-------|
| <b>x = 0.05</b> | <i>Pnma</i> , $a = 5.54765(4)$ Å, $b = 5.55665(3)$ Å, $c = 7.84294(5)$ Å |            |            |            |         |       |
| La              | 4c                                                                       | 0.9934(2)  | 0.02818(7) | 0.25       | 0.67(1) | 0.475 |
| Ca              | 4c                                                                       | 0.9934(2)  | 0.02818(7) | 0.25       | 0.67(1) | 0.025 |
| Fe              | 4b                                                                       | 0          | 0.5        | 0          | 0.47(1) | 0.5   |
| O1              | 8d                                                                       | 0.7178(11) | 0.2798(11) | 0.0340(9)  | 1.1(1)  | 1     |
| O2              | 4c                                                                       | 0.0784(20) | 0.4879(7)  | 0.25       | 2.5(2)  | 0.5   |
| <b>x = 0.10</b> | <i>Pnma</i> , $a = 5.5408(1)$ Å, $b = 5.54966(8)$ Å, $c = 7.8318(1)$ Å   |            |            |            |         |       |
| La              | 4c                                                                       | 0.9940(5)  | 0.0268(1)  | 0.25       | 0.80(1) | 0.45  |
| Ca              | 4c                                                                       | 0.9940(5)  | 0.0268(1)  | 0.25       | 0.80(1) | 0.05  |
| Fe              | 4b                                                                       | 0          | 0.5        | 0          | 0.61(2) | 0.5   |
| O1              | 8d                                                                       | 0.7167(24) | 0.2755(25) | 0.0283(18) | 0.8(2)  | 1     |
| O2              | 4c                                                                       | 0.0948(40) | 0.4896(18) | 0.25       | 4.2(5)  | 0.5   |
| <b>x = 0.15</b> | <i>Pbnm</i> , $a = 5.5298(1)$ Å, $b = 5.54268(9)$ Å, $c = 7.8163(1)$ Å   |            |            |            |         |       |
| La              | 4c                                                                       | 0.9938(6)  | 0.0256(1)  | 0.25       | 0.69(2) | 0.4   |
| Ca              | 4c                                                                       | 0.9938(6)  | 0.0256(1)  | 0.25       | 0.69(2) | 0.1   |
| Fe              | 4b                                                                       | 0          | 0.5        | 0          | 0.46(3) | 0.5   |
| O1              | 8d                                                                       | 0.7193(20) | 0.2770(21) | 0.0352(16) | 0.4(2)  | 1     |
| O2              | 4c                                                                       | 0.0794(39) | 0.4898(14) | 0.25       | 4.3(5)  | 0.5   |
| <b>x = 0.20</b> | <i>Pbnm</i> , $a = 5.5216(1)$ Å, $b = 5.5347(1)$ Å, $c = 7.8045(1)$ Å    |            |            |            |         |       |
| La              | 4c                                                                       | 0.9948(8)  | 0.0240(1)  | 0.25       | 0.84(2) | 0.4   |
| Ca              | 4c                                                                       | 0.9948(8)  | 0.0240(1)  | 0.25       | 0.84(2) | 0.1   |
| Fe              | 4b                                                                       | 0          | 0.5        | 0          | 0.56(3) | 0.5   |
| O1              | 8d                                                                       | 0.7216(31) | 0.2782(29) | 0.0232(21) | 0.2(2)  | 1     |
| O2              | 4c                                                                       | 0.1092(37) | 0.4927(21) | 0.25       | 4.9(5)  | 0.5   |
| <b>x = 0.30</b> | <i>Pbnm</i> , $a = 5.5026(1)$ Å, $b = 5.52552(9)$ Å, $c = 7.7778(1)$ Å   |            |            |            |         |       |
| La              | 4c                                                                       | 0.9950(5)  | 0.0216(1)  | 0.25       | 0.75(1) | 0.35  |
| Ca              | 4c                                                                       | 0.9950(5)  | 0.0216(1)  | 0.25       | 0.75(1) | 0.15  |
| Fe              | 4b                                                                       | 0          | 0.5        | 0          | 0.61(1) | 0.5   |
| O1              | 8d                                                                       | 0.7234(18) | 0.2835(15) | 0.0148(12) | 0.15(9) | 1     |
| O2              | 4c                                                                       | 0.1179(20) | 0.5012(14) | 0.25       | 5.7(3)  | 0.5   |
| <b>x = 0.40</b> | <i>Pbnm</i> , $a = 5.4882(1)$ Å, $b = 5.5171(1)$ Å, $c = 7.7572(1)$ Å    |            |            |            |         |       |
| La              | 4c                                                                       | 0.9991(12) | 0.0215(1)  | 0.25       | 0.86(1) | 0.3   |
| Ca              | 4c                                                                       | 0.9991(12) | 0.0215(1)  | 0.25       | 0.86(1) | 0.2   |
| Fe              | 4b                                                                       | 0          | 0.5        | 0          | 1.16(2) | 0.5   |
| O1              | 8d                                                                       | 0.7267(18) | 0.2806(15) | 0.0142(11) | 0.09(9) | 1     |
| O2              | 4c                                                                       | 0.1391(18) | 0.4939(17) | 0.25       | 7.0(3)  | 0.5   |

**Table S2** Activation energies of the chemical diffusion coefficient ( $D_{\text{chem}}$ ) for  $\text{La}_{1-x}\text{Ca}_x\text{FeO}_{3-\delta}$  derived from different temperature regions (designated by the space groups; cf. Fig. 3) in corresponding Arrhenius plots (Fig. 11a). Data are given for both oxidation (Ox) and reductions (Red) runs.

| x    | $E_a$ (eV)  |            |             |            |
|------|-------------|------------|-------------|------------|
|      | Red         |            | Ox          |            |
|      | <i>Pbnm</i> | <i>R3c</i> | <i>Pbnm</i> | <i>R3c</i> |
| 0.05 | 1.80±0.02   | -          | 1.80±0.02   | -          |
| 0.10 | 1.46±0.02   | 1.05±0.07  | 1.45±0.02   | 1.04±0.07  |
| 0.15 | 1.40±0.02   | 0.97±0.04  | 1.42±0.03   | 0.96±0.04  |
| 0.20 | 1.12±0.01   | 0.75±0.01  | 1.17±0.01   | 0.75±0.01  |
| 0.30 | 1.53±0.01   | 0.98±0.01  | 1.40±0.04   | 0.95±0.01  |
| 0.40 | -           | 1.09±0.02  | -           | 1.02±0.02  |

**Table S3** Activation energies of the oxygen self-diffusion coefficient ( $D_s$ ) for  $\text{La}_{1-x}\text{Ca}_x\text{FeO}_{3-\delta}$  derived from Arrhenius plots (Fig. 12a) along with the corresponding coefficients of determination ( $R^2$ ) of the linear fitting. Data are given for both oxidation (Ox) and reductions (Red) runs.

| x    | Red       |       | Ox        |       |
|------|-----------|-------|-----------|-------|
|      | $E_a$     | $R^2$ | $E_a$     | $R^2$ |
|      | (eV)      | (-)   | (eV)      | (-)   |
| 0.05 | 1.92±0.03 | 0.998 | 1.93±0.03 | 0.997 |
| 0.10 | 1.68±0.01 | 0.999 | 1.66±0.01 | 0.999 |
| 0.15 | 1.77±0.02 | 0.999 | 1.75±0.02 | 0.999 |
| 0.20 | 1.47±0.01 | 0.998 | 1.48±0.02 | 0.998 |
| 0.30 | 1.57±0.02 | 0.998 | 1.51±0.01 | 0.999 |
| 0.40 | 1.50±0.02 | 0.997 | 1.43±0.02 | 0.997 |

**Table S4** Activation energies of the oxygen vacancy diffusion coefficient ( $D_v$ ) for  $\text{La}_{1-x}\text{Ca}_x\text{FeO}_{3-\delta}$  derived from Arrhenius plots (Fig. 12b) along with the corresponding coefficients of determination ( $R^2$ ) of the linear fitting. Data are given for both oxidation (Ox) and reductions (Red) runs.

| x    | Red          |       | Ox           |       |
|------|--------------|-------|--------------|-------|
|      | $\Delta H_m$ | $R^2$ | $\Delta H_m$ | $R^2$ |
|      | (eV)         | (-)   | (eV)         | (-)   |
| 0.05 | 1.72±0.02    | 0.998 | 1.72±0.03    | 0.997 |
| 0.10 | 1.44±0.02    | 0.998 | 1.43±0.02    | 0.998 |
| 0.15 | 1.41±0.02    | 0.998 | 1.39±0.02    | 0.998 |
| 0.20 | 1.18±0.03    | 0.994 | 1.20±0.03    | 0.993 |
| 0.30 | 1.17±0.02    | 0.997 | 1.15±0.02    | 0.997 |
| 0.40 | 1.11±0.03    | 0.994 | 1.05±0.03    | 0.992 |

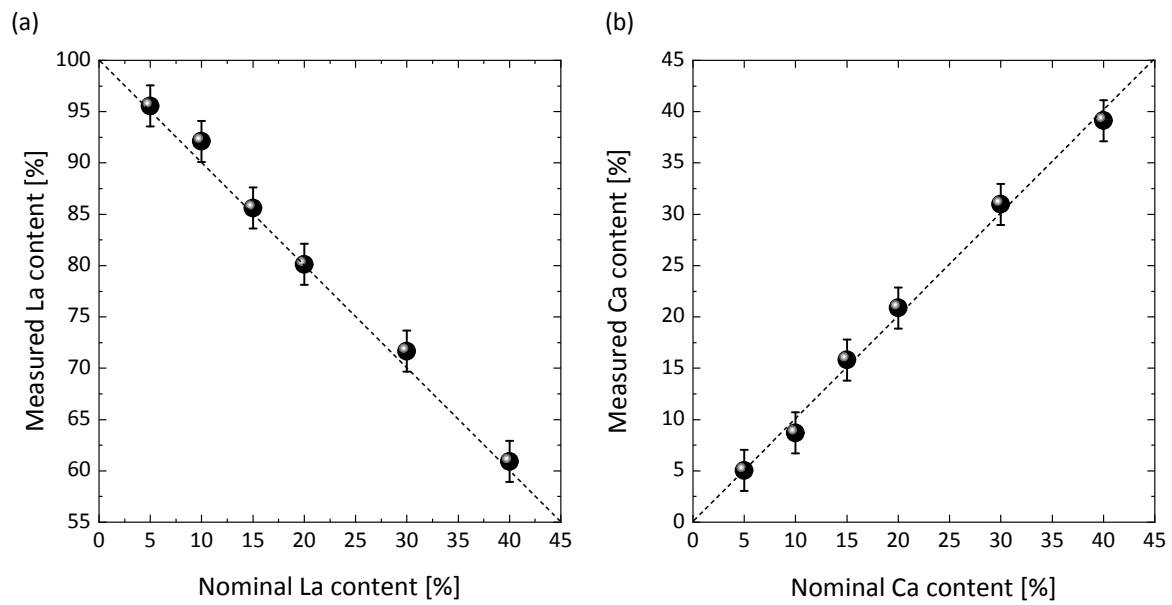

**Fig. S1** Measured composition (by XRF analysis) vs nominal composition for samples  $\text{La}_{1-x}\text{Ca}_x\text{FeO}_{3-\delta}$ ; (a) La content and (b) Ca content.

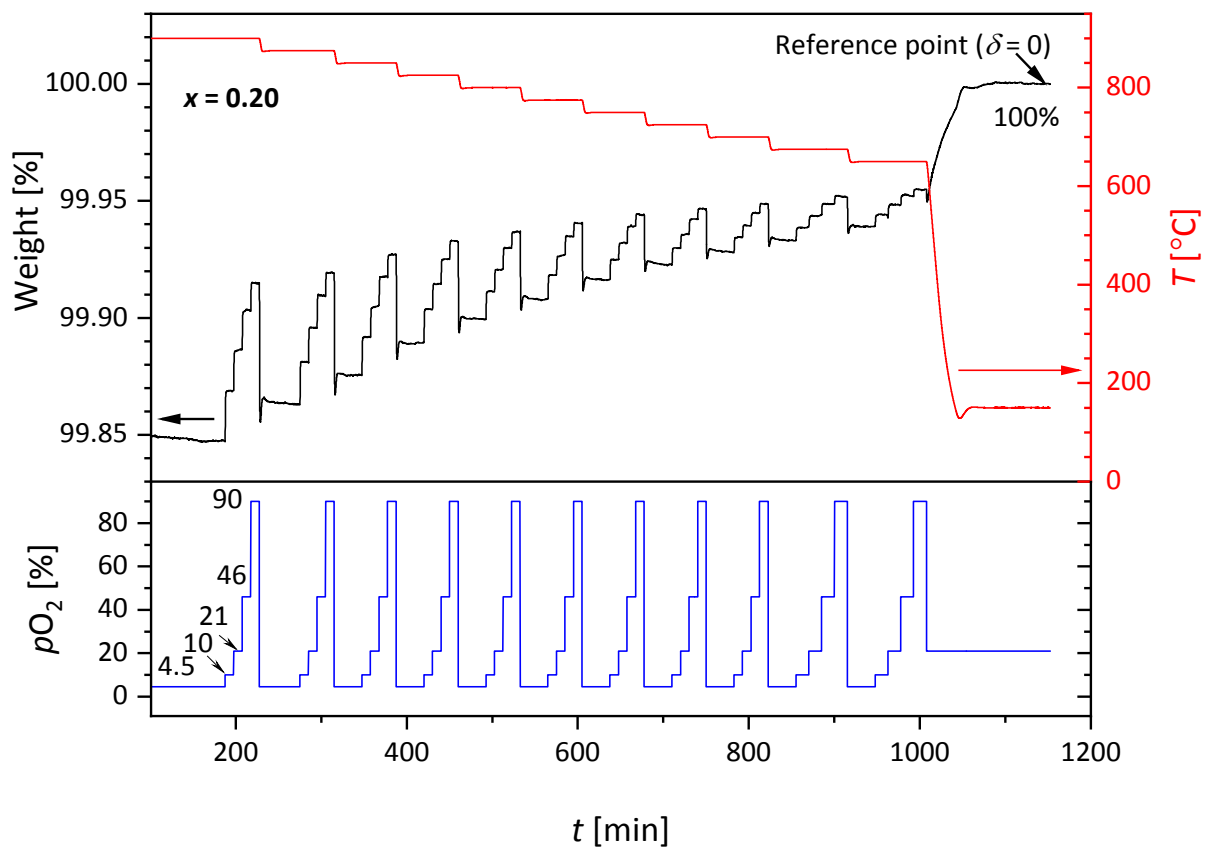

**Fig. S2** Typical measurement scheme used for thermogravimetric analysis. Data shown are for  $La_{1-x}Ca_xFeO_{3-\delta}$  ( $x = 0.20$ ).

(a)

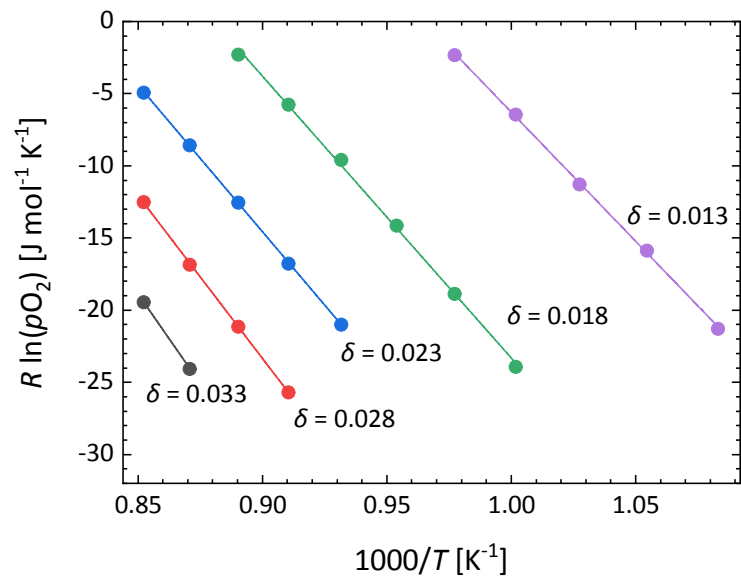

(b)

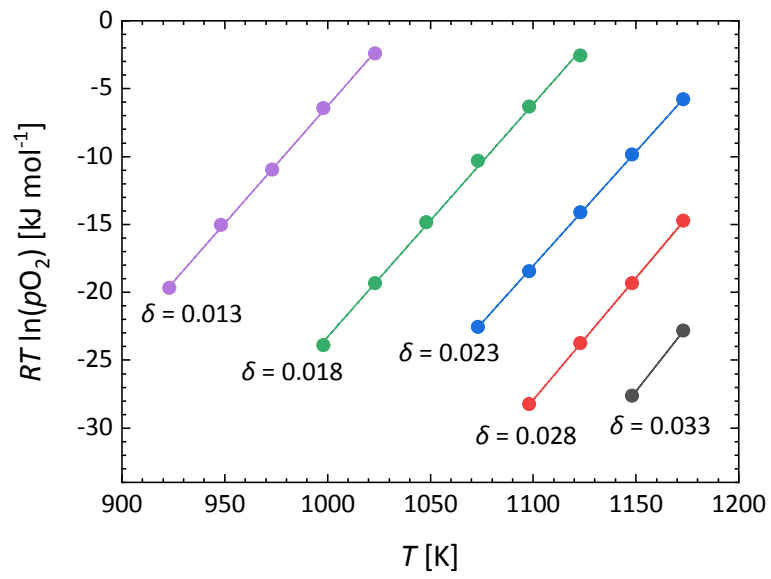

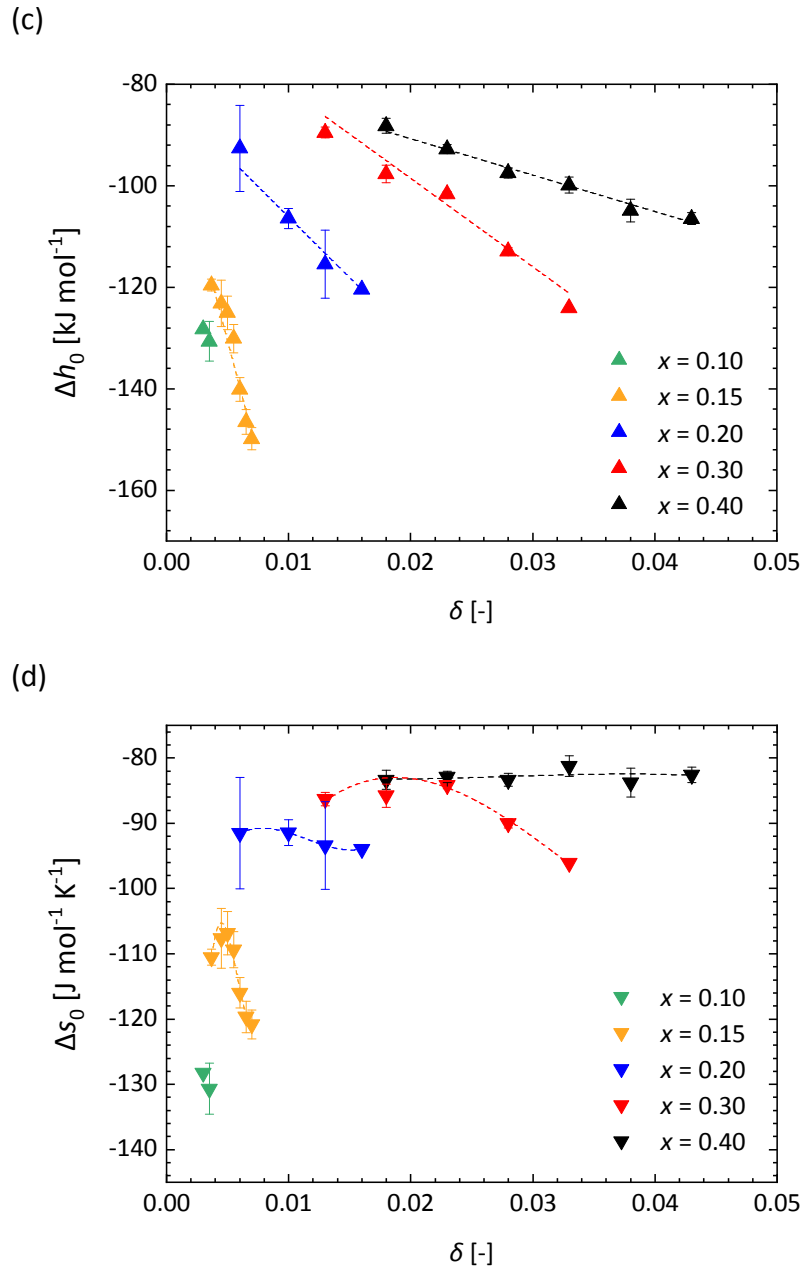

**Fig. S3** (a)  $R\ln(pO_2)$  vs  $1/T$  and (b)  $RT\ln(pO_2)$  vs  $T$  plots for  $\text{La}_{0.7}\text{Ca}_{0.3}\text{FeO}_{3-\delta}$ , at given values of  $\delta$ , used for evaluation of the partial molar enthalpy of oxygen,  $\Delta h_o$ , and the partial molar entropy of oxygen,  $\Delta s_o$ . (c)  $\Delta h_o$  and (d)  $\Delta s_o$ , at given values of  $x$  in  $\text{La}_{1-x}\text{Ca}_x\text{FeO}_{3-\delta}$ , as a function of  $\delta$  as derived from similar  $R\ln(pO_2)$  vs  $1/T$  and  $RT\ln(pO_2)$  vs  $T$  plots.

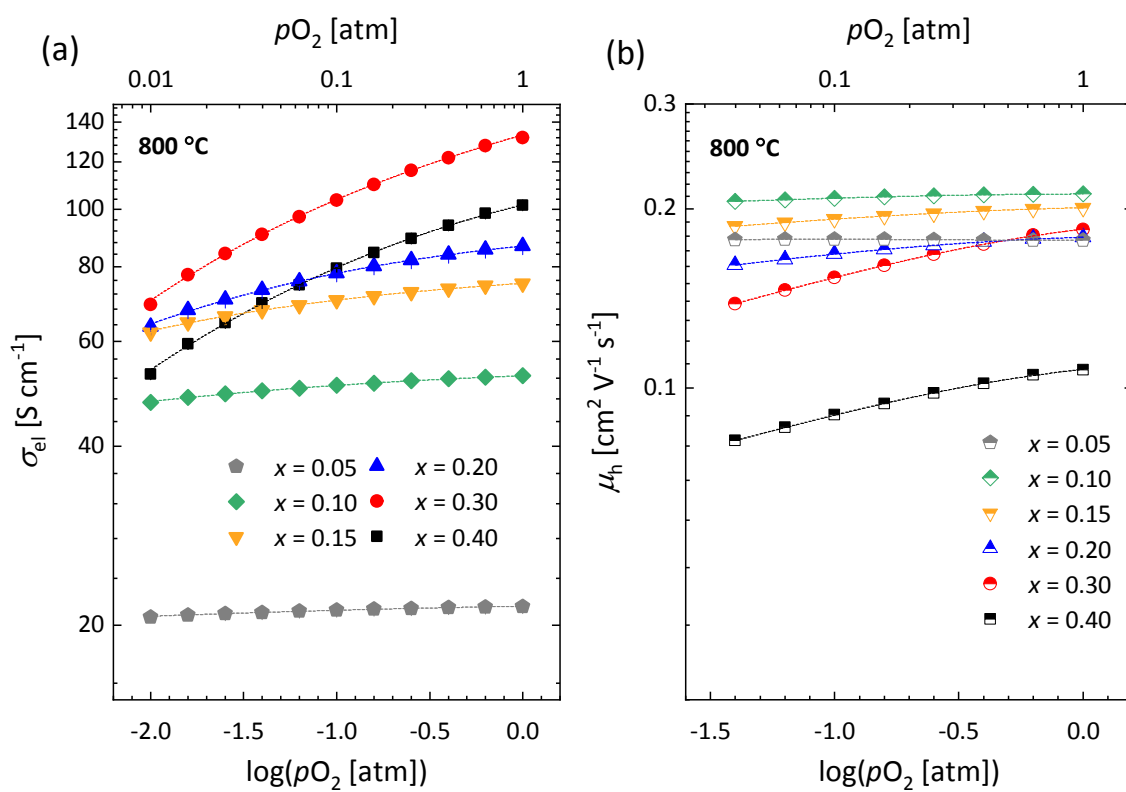

**Fig. S4**  $pO_2$  dependence of the (a) electrical conductivity ( $\sigma_{el}$ ) and (b) electrical mobility ( $\mu_h$ ) for  $La_{1-x}Ca_xFeO_{3-\delta}$  at 800 °C. The dashed lines are drawn to guide the eye.



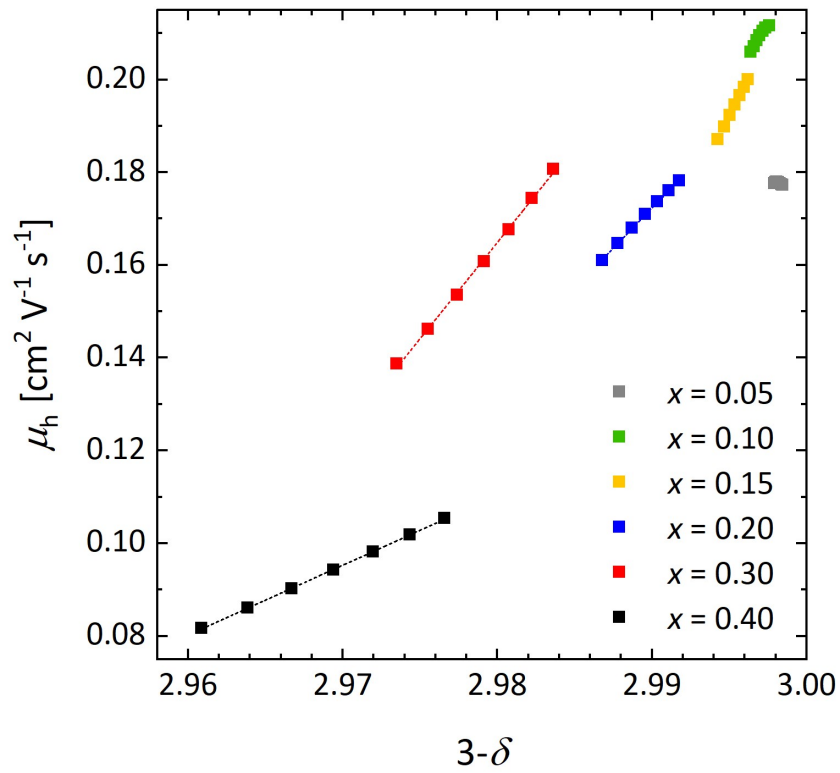

**Fig. S5** Mobility of electron holes ( $\mu_h$ ), at 800 °C, for  $\text{La}_{1-x}\text{Ca}_x\text{FeO}_{3-\delta}$  as a function of oxygen content ( $3-\delta$ ). The dashed lines are drawn to guide the eye.

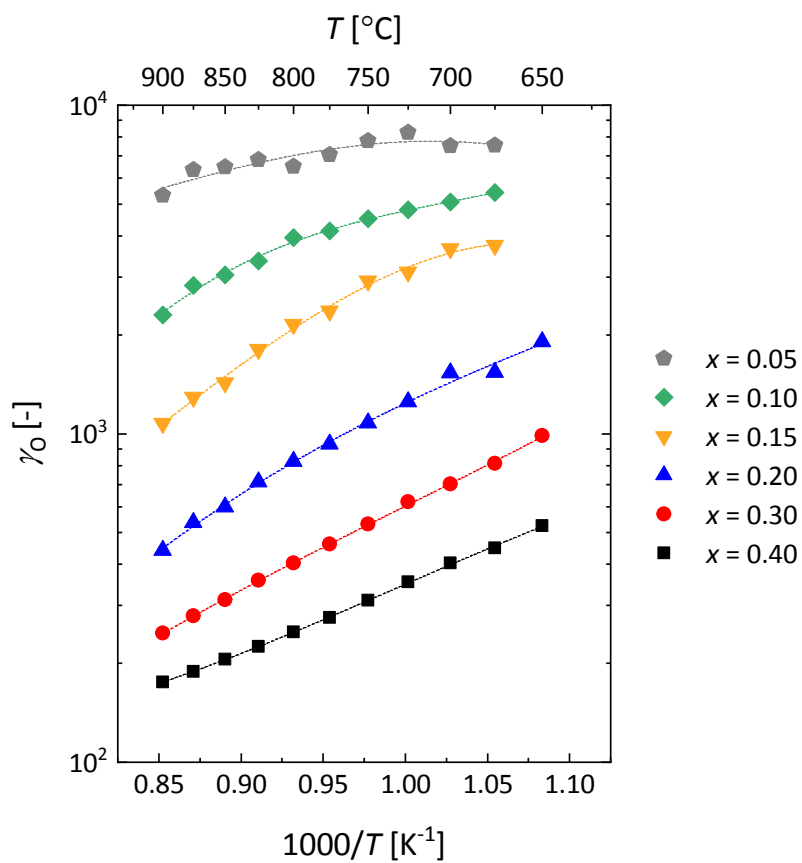

**Fig. S6** Inverse temperature dependence of the thermodynamic factor for  $La_{1-x}Ca_xFeO_{3-\delta}$ , at  $pO_2 = 0.147$  atm, calculated from data of thermogravimetry (*cf.* Fig. 4). The specified  $pO_2$  corresponds to the logarithmic average of the step change in  $pO_2$  ( $0.10 \leftrightarrow 0.215$  atm) used in the ECR measurements.

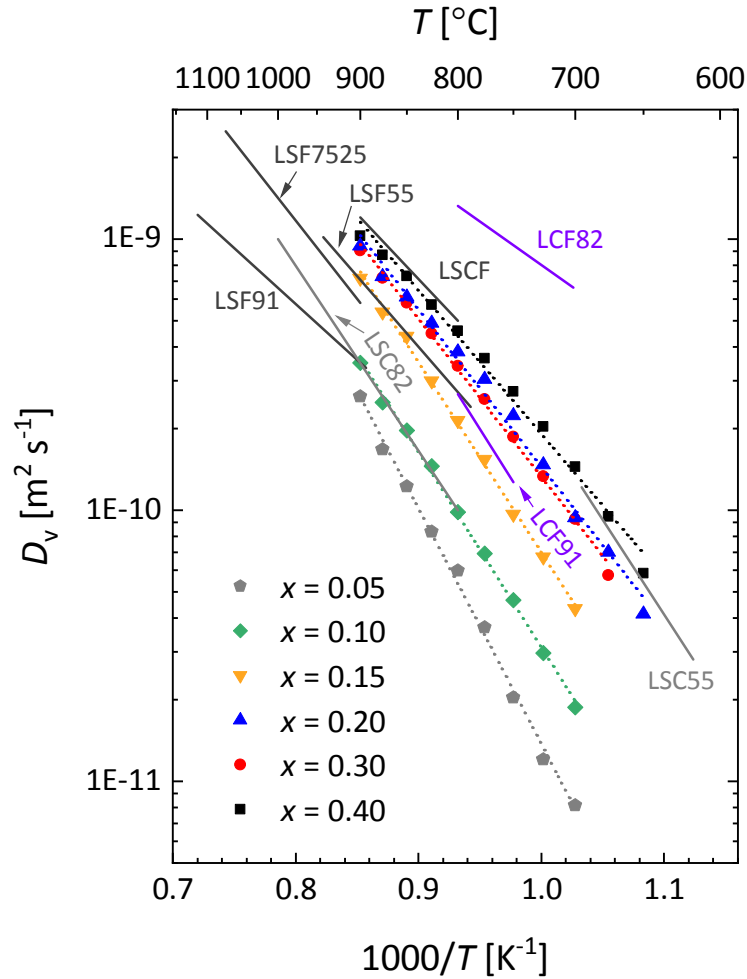

**Fig. S7** Comparison of the oxygen vacancy diffusion coefficients ( $D_v$ ) for  $\text{La}_{1-x}\text{Ca}_x\text{FeO}_{3-\delta}$  (this work) with data for selected perovskite-type oxides from literature. Data for  $\text{La}_{0.9}\text{Ca}_{0.1}\text{FeO}_{3-\delta}$  (LCF91) from Ref. 1,  $\text{La}_{0.8}\text{Ca}_{0.2}\text{FeO}_{3-\delta}$  (LCF92) from Ref. 2,  $\text{La}_{1-x}\text{Sr}_x\text{FeO}_{3-\delta}$  ( $x = 0.1$  (LSF91),  $x = 0.25$  (LSF7525)) from Ref. 3,  $\text{La}_{0.5}\text{Sr}_{0.5}\text{FeO}_{3-\delta}$  (LSF55) from Ref. 4,  $\text{La}_{1-x}\text{Sr}_x\text{CoO}_{3-\delta}$  ( $x = 0.2$  (LSC82),  $x = 0.5$  (LSF55)) from Ref. 5, and  $\text{La}_{0.6}\text{Sr}_{0.4}\text{Co}_{0.2}\text{Fe}_{0.8}\text{O}_{3-\delta}$  (LSCF) from Ref. 6.

## References

- 1 C. Berger, E. Bucher, and W. Sitte, *Solid State Ionics*, 2017, **299**, 46-54.
- 2 C. Berger, E. Bucher, A. Windischbache, A. D. Boese, and W. Sitte, 2018, **259**, 57-66.
- 3 T. Ishigaki, S. Yamauchi, K. Kishio, J. Mizusaki and K. Fueki, *J. Solid State Chem.*, 1988, **73**, 179–187.
- 4 J. Yoo, A. Verma, S. Y. Wang, and A. J. Jacobson, *J. Electrochem. Soc.*, 2005, **152**, A497
- 5 R. A. De Souza, and J. A. Kilner, 1998, **106**, 175-187.
- 6 A. Esquirol, J. A. Kilner, and N. Brandon, 2004, **175**, 63-67.
